# Supplementary material for: Pandemic Dynamics and the Breakdown of Herd Immunity
Source: PubMed Central journal article supplement (PMC2837721; doi:10.1371/journal.pone.0009565), 2010-03-15
Supplement: pone.0009565.s001.pdf [file pone.0009565.s001.pdf]

# Supporting Text for “Pandemic dynamics and the breakdown of herd immunity”

Guy Katriel, Lewi Stone

## 1 Deriving characteristics of an epidemic from the SIR model

We derive analytic expressions for the attack rate  $A$  and for the duration  $D$  of an epidemic described by the SIR model

$$S' = -\beta IS, \tag{1}$$

$$I' = \beta IS - \gamma I, \tag{2}$$

$$R' = \gamma I. \tag{3}$$

with the conditions

$$S(-\infty) = S_0, \quad I(-\infty) = 0, \quad R(-\infty) = 1 - S_0. \tag{4}$$

in terms of the parameters  $\gamma$ ,  $\mathcal{R}_0 = \frac{\beta}{\gamma}$ ,  $\mathcal{R}_e = S_0 \mathcal{R}_0$ .

Since  $A$ ,  $D$ , and  $\gamma$  are approximately known (see assumptions (a)-(c) in the main text), these expressions enable us to estimate the parameters  $\mathcal{R}_e$ ,  $\mathcal{R}_0$ ,  $S_0$ .

### 1.1 The attack rate

The attack rate in the SIR model is given by the final size formula, which is well-known, see e.g. [1] and recalled for the reader’s convenience. From (1),(15), we have so that

$$S(t) = S_0 e^{-\beta \int_{-\infty}^t I(s) ds}. \tag{5}$$

From (1),(2) we have

$$I'(t) + \gamma I(t) = -S'(t)$$

and integrating both sides, using (15), we have

$$I(t) + \gamma \int_{-\infty}^t I(s) ds = S_0 - S(t). \quad (6)$$

Substituting (6) into (5) we have

$$S(t) = S_0 e^{-\mathcal{R}_0[S_0 - S(t) - I(t)]}. \quad (7)$$

Taking  $t \rightarrow \infty$  we have

$$S(\infty) = S_0 e^{-\mathcal{R}_0[S_0 - S(\infty)]},$$

and setting

$$Z = 1 - \frac{S(\infty)}{S_0}$$

we rewrite

$$1 - Z = e^{-\mathcal{R}_e Z}. \quad (8)$$

Note that  $Z$  is the fraction of susceptibles who get infected during the epidemic. Note that this fraction is determined by  $\mathcal{R}_e$  (we mention that, in the notation of [1],  $R_0$  is what we here call  $\mathcal{R}_e$ ). The attack rate (the fraction of the population who get infected during the epidemic) is

$$A = S_0 Z. \quad (9)$$

Note also that, for given  $\mathcal{R}_0$ , the fraction  $S_0$  of susceptibles affects the attack rate  $A$  in two ways: first through its effect on  $\mathcal{R}_e$  and hence on  $Z$ , and secondly through the relation (9).

We can also write (8) in terms of  $A$ , as

$$1 - \frac{A}{S_0} = e^{-\mathcal{R}_0 A}. \quad (10)$$

## 1.2 Duration of the epidemic

We must give a precise definition of what we mean by the “duration of the epidemic”. We define the epidemic period  $[t_1, t_2]$  by the following conditions

- (1) %90 of the cases occur within this period, that is  $S(t_1) - S(t_2) = 0.9A$ ,
- (2)  $I(t_1) = I(t_2)$ .

The value  $D = t_2 - t_1$  is called the duration of the epidemic.

There is some arbitrariness in the above definition. The value %90 can of course be replaced by a different fraction. In fact to be general we shall replace 0.9 by  $\alpha$  in the derivations below, so that we have

$$S(t_1) - S(t_2) = \alpha A. \quad (11)$$

The condition  $I(t_1) = I(t_2)$  could be replaced by the condition that the interval  $[t_1, t_2]$  is centered at the peak of the epidemic (where the peak can be defined in at least two ways: as the time of the maximum of  $I(t)$ , or as the time of the maximum of the incidence  $i(t) = -S'(t)$ ). This would not change the duration by much in practice, and is less convenient analytically, and we therefore chose the definition above.

**Lemma 1.** *The duration of an epidemic is given by*

$$D = \frac{1}{\gamma} \int_{\frac{\alpha Z}{(1-Z)^{-\alpha-1}}}^{\frac{\alpha Z}{1-(1-Z)^\alpha}} \frac{1}{u} \frac{du}{\mathcal{R}_e(1-u) + \log(u)}, \quad (12)$$

where  $Z$  is defined by (8).

An important consequence is that the duration of an epidemic depends only on  $\gamma$  and on  $\mathcal{R}_e$ .

*Proof.* From (7), and using  $I(t_1) = I(t_2)$  and (11) we have

$$\frac{S(t_2)}{S(t_1)} = e^{-\mathcal{R}_0[S(t_1)-S(t_2)+I(t_2)-I(t_1)]} = e^{-\mathcal{R}_0[S(t_1)-S(t_2)]} = e^{-\alpha \mathcal{R}_0 A} \quad (13)$$

(11) and (13) provide us with two equations for  $S(t_1), S(t_2)$  which can be solved to give

$$S(t_1) = \frac{\alpha A}{1 - e^{-\alpha \mathcal{R}_0 A}}, \quad S(t_2) = \frac{\alpha A}{e^{\alpha \mathcal{R}_0 A} - 1},$$

and using (10) we can rewrite this as

$$S(t_1) = \frac{\alpha A}{1 - (1 - \frac{A}{S_0})^\alpha}, \quad S(t_2) = \frac{\alpha A}{(1 - \frac{A}{S_0})^{-\alpha} - 1}. \quad (14)$$

Solving (2) for  $I$  we have, fixing an arbitrary  $t_0$ ,

$$I(t) = I(t_0)e^{-\gamma(t-t_0)}e^{\beta \int_{t_0}^t S(r)dr}.$$

Setting

$$x(t) = \log(S(t))$$

We have

$$x'(t) = \frac{S'(t)}{S(t)} = -\beta I(t) = -\beta I(t_0)e^{-\gamma(t-t_0)}e^{\beta \int_{t_0}^t S(r)dr}$$

and

$$x(t_0) = \log(S(t_0)), \quad x'(t_0) = -\beta I(t_0). \quad (15)$$

Therefore

$$\begin{aligned} x''(t) &= \gamma\beta I(t_0)e^{-\gamma(t-t_0)}e^{\beta \int_{t_0}^t S(r)dr} - \beta^2 I(t_0)e^{-\gamma(t-t_0)}S(t)e^{\beta \int_{t_0}^t S(r)dr} \\ &= -\gamma x'(t) + \beta e^{x(t)}x'(t) \end{aligned}$$

so

$$x'(t) = \beta e^{x(t)} - \gamma x(t) + C$$

where, using (15),

$$C = \gamma \log(S(t_0)) - \beta(I(t_0) + S(t_0)),$$

so

$$x'(t) = \beta e^{x(t)} - \gamma x(t) + \gamma \log(S(t_0)) - \beta(I(t_0) + S(t_0)).$$

We note that  $x(t)$  is independent of the choice of  $t_0$ , which shows that the expression  $\gamma \log(S(t_0)) - \beta(I(t_0) + S(t_0))$  is independent of  $t_0$ , and in particular we may send  $t_0 \rightarrow -\infty$  and obtain

$$\begin{aligned} x'(t) &= \beta e^{x(t)} - \gamma x(t) + \gamma \log(S_0) - \beta S_0 \\ &= \gamma[\mathcal{R}_0 e^{x(t)} - x(t) + \log(S_0) - \mathcal{R}_0 S_0]. \end{aligned}$$

Thus

$$\frac{1}{\gamma} \frac{x'(t)}{\mathcal{R}_0 e^{x(t)} - x(t) + \log(S_0) - \mathcal{R}_0 S_0} = 1,$$

and integrating from  $t_1$  to  $t_2$  we have

$$\frac{1}{\gamma} \int_{t_1}^{t_2} \frac{x'(t) dt}{\mathcal{R}_0 e^{x(t)} - x(t) + \log(S_0) - \mathcal{R}_0 S_0} = t_2 - t_1.$$

Making the substitution

$$S = e^{x(t)}, \quad dS = e^{x(t)} x'(t) dt$$

we get

$$\frac{1}{\gamma} \int_{S(t_1)}^{S(t_2)} \frac{1}{S \log(\frac{S_0}{S}) - \mathcal{R}_0(S_0 - S)} dS = t_2 - t_1,$$

or, using (14),

$$D = t_2 - t_1 = \frac{1}{\gamma} \int_{\frac{\alpha A}{1 - (1 - \frac{A}{S_0})^\alpha}}^{\frac{\alpha A}{(1 - \frac{A}{S_0})^{-\alpha} - 1}} \frac{1}{S \log(\frac{S_0}{S}) - \mathcal{R}_0(S_0 - S)} dS.$$

Finally, making the substitution  $S = S_0 u$  gives (12). □

Using (12) we can calculate the duration of epidemics by numerical evaluation of the integral, with some results given in Table 1.

## References

- [1] Murray J.D. Mathematical Biology 1989 Springer-Verlag New York, pp767.
